# Supplementary material
Source: PubMed Central journal article supplement (PMC6320387)
Supplement: mmc1.pdf [file mmc1.pdf]

# Post-Weaning Housing Conditions Influence Freezing during Contextual Fear Conditioning in Adult Rats

Natalie Schroyens, Christian Luis Bender, Joaquín Matias Alfei, Victor Alejandro Molina, Laura Luyten, Tom Beckers

## -- Appendix A: Statistical Analyses performed in JASP (Version 0.8.5.1) --

***This overview contains results of all preregistered statistical analyses (<https://osf.io/q92v8>):***

1. The amnestic effect of MDZ in the standard housing (SH) group  
→ *One-sided T-tests*
2. The influence of enriched housing (EH) on the amnestic effect of MDZ  
→ *ANOVAs with factors Housing (EH vs. SH) and Treatment (SAL vs. MDZ)*
3. The influence of impoverished housing (IH) on the amnestic effect of MDZ  
→ *ANOVAs with factors Housing (IH vs. SH) and Treatment (SAL vs. MDZ)*
4. Group differences in the temporal pattern of % freezing during the test session  
→ *ANOVAs with BS factors Housing and Treatment and WS factor Time*
5. The influence of housing conditions on % freezing during pre- and post-shock period and reactivation.  
→ *ANOVAs with factor Housing (EH, IH, SH)*
6. The influence of housing conditions on body weight  
→ *ANOVA with factor Housing (EH, IH, SH) and ANOVA with WS factor Age and BS factor Housing (EH, IH, SH)*

## 1. The amnesic effect of MDZ in the standard housing (SH) group

A one-sided T-test (SAL > MDZ) was used to compare % freezing during the test session (first 5 min and complete 10-min session) between rats that received post-reactivation SAL vs. MDZ.

### A. For the complete 10-min test session

#### Group Descriptives

|         | Group | N | Mean  | SD    | SE    |
|---------|-------|---|-------|-------|-------|
| T_10min | MDZ   | 8 | 30.83 | 7.828 | 2.767 |
|         | SAL   | 8 | 31.65 | 8.849 | 3.129 |

#### Independent Samples T-Test

|         | Test         | Statistic | df    | p     | Effect Size | 95% CI for Effect Size |       |
|---------|--------------|-----------|-------|-------|-------------|------------------------|-------|
|         |              |           |       |       |             | Lower                  | Upper |
| T_10min | Student      | -0.195    | 14.00 | 0.424 | -0.097      | -∞                     | 0.727 |
|         | Mann-Whitney | 28.000    |       | 0.360 | -0.125      | -∞                     | 0.349 |

Note. For the Student t-test, effect size is given by Cohen's *d* ; for the Mann-Whitney test, effect size is given by the rank biserial correlation.

Note. For all tests, the alternative hypothesis specifies that group MDZ is less than group SAL .

#### Test of Normality (Shapiro-Wilk)

|         |     | W     | p     |
|---------|-----|-------|-------|
| T_10min | MDZ | 0.956 | 0.769 |
|         | SAL | 0.811 | 0.037 |

Note. Significant results suggest a deviation from normality.

#### Test of Equality of Variances (Levene's)

|         | F     | df | p     |
|---------|-------|----|-------|
| T_10min | 0.075 | 1  | 0.789 |

### B. For the first 5 min of the test session

#### Group Descriptives

|        | Group | N | Mean  | SD    | SE    |
|--------|-------|---|-------|-------|-------|
| T_5min | MDZ   | 8 | 23.88 | 5.589 | 1.976 |
|        | SAL   | 8 | 29.46 | 9.020 | 3.189 |

#### Independent Samples T-Test

|        | Test         | Statistic | df    | p     | Effect Size | 95% CI for Effect Size |        |
|--------|--------------|-----------|-------|-------|-------------|------------------------|--------|
|        |              |           |       |       |             | Lower                  | Upper  |
| T_5min | Student      | -1.488    | 14.00 | 0.079 | -0.744      | -∞                     | 0.122  |
|        | Mann-Whitney | 15.000    |       | 0.041 | -0.531      | -∞                     | -0.102 |

Note. For the Student t-test, effect size is given by Cohen's *d* ; for the Mann-Whitney test, effect size is given by the rank biserial correlation.

Note. For all tests, the alternative hypothesis specifies that group MDZ is less than group SAL .

#### Test of Normality (Shapiro-Wilk)

|        |     | W     | p     |
|--------|-----|-------|-------|
| T_5min | MDZ | 0.902 | 0.301 |
|        | SAL | 0.759 | 0.010 |

Note. Significant results suggest a deviation from normality.

#### Test of Equality of Variances (Levene's)

|        | F     | df | p     |
|--------|-------|----|-------|
| T_5min | 1.819 | 1  | 0.199 |

As a control, a two-sided T-test was used to assess whether there was a difference in % freezing during reactivation between rats of the SAL vs. MDZ group. In case of a between-group difference in % freezing during reactivation, we planned to perform a mixed ANOVA with within-subjects factor Session (reactivation vs. test) and between-subjects factor Treatment (SAL vs. MDZ).

| Group Descriptives |       |   |       |       |       |
|--------------------|-------|---|-------|-------|-------|
|                    | Group | N | Mean  | SD    | SE    |
| R_5min             | MDZ   | 8 | 45.46 | 12.88 | 4.555 |
|                    | SAL   | 8 | 49.46 | 12.17 | 4.303 |

| Independent Samples T-Test |              |           |       |       |             |                        |       |
|----------------------------|--------------|-----------|-------|-------|-------------|------------------------|-------|
|                            | Test         | Statistic | df    | p     | Effect Size | 95% CI for Effect Size |       |
|                            |              |           |       |       |             | Lower                  | Upper |
| R_5min                     | Student      | -0.638    | 14.00 | 0.534 | -0.319      | -1.301                 | 0.673 |
|                            | Mann-Whitney | 27.000    |       | 0.636 | -0.156      | -0.630                 | 0.402 |

Note. For the Student t-test, effect size is given by Cohen's *d* ; for the Mann-Whitney test, effect size is given by the rank biserial correlation.

| Test of Normality (Shapiro-Wilk) |     |       |       |
|----------------------------------|-----|-------|-------|
|                                  |     | W     | p     |
| R_5min                           | MDZ | 0.798 | 0.027 |
|                                  | SAL | 0.952 | 0.727 |

Note. Significant results suggest a deviation from normality.

| Test of Equality of Variances (Levene's) |       |    |       |
|------------------------------------------|-------|----|-------|
|                                          | F     | df | p     |
| R_5min                                   | 0.888 | 1  | 0.362 |

## 2. The influence of enriched housing (EH) on the amnestic effect of MDZ

A two-way ANOVA with factors Housing (EH vs. SH) and Treatment (SAL vs. MDZ) was performed to assess the influence of enriched housing on the amnestic effect of MDZ on % freezing during test (first 5 min and complete 10-min session).

### A. For the complete 10-min test session

| Descriptives - T_10min |           |       |        |   |
|------------------------|-----------|-------|--------|---|
| Housing                | Treatment | Mean  | SD     | N |
| EH                     | MDZ       | 35.75 | 8.822  | 8 |
|                        | SAL       | 32.81 | 14.187 | 8 |
| SH                     | MDZ       | 30.83 | 7.828  | 8 |
|                        | SAL       | 31.65 | 8.849  | 8 |

| ANOVA - T_10min     |                |    |             |       |       |          |            |
|---------------------|----------------|----|-------------|-------|-------|----------|------------|
| Cases               | Sum of Squares | df | Mean Square | F     | p     | $\eta^2$ | $\eta^2_p$ |
| Housing             | 74.014         | 1  | 74.014      | 0.707 | 0.408 | 0.024    | 0.025      |
| Treatment           | 9.031          | 1  | 9.031       | 0.086 | 0.771 | 0.003    | 0.003      |
| Housing * Treatment | 28.125         | 1  | 28.125      | 0.269 | 0.608 | 0.009    | 0.010      |
| Residual            | 2930.715       | 28 | 104.668     |       |       |          |            |

Note. Type III Sum of Squares

### B. For the first 5 min of the test session

| Descriptives - T_5min |           |       |        |   |
|-----------------------|-----------|-------|--------|---|
| Housing               | Treatment | Mean  | SD     | N |
| EH                    | MDZ       | 30.71 | 9.447  | 8 |
|                       | SAL       | 28.08 | 12.414 | 8 |
| SH                    | MDZ       | 23.88 | 5.589  | 8 |
|                       | SAL       | 29.46 | 9.020  | 8 |

#### ANOVA - T\_5min

| Cases               | Sum of Squares | df | Mean Square | F     | p     | $\eta^2$ | $\eta^2_p$ |
|---------------------|----------------|----|-------------|-------|-------|----------|------------|
| Housing             | 59.59          | 1  | 59.59       | 0.670 | 0.420 | 0.022    | 0.023      |
| Treatment           | 17.50          | 1  | 17.50       | 0.197 | 0.661 | 0.006    | 0.007      |
| Housing * Treatment | 134.75         | 1  | 134.75      | 1.514 | 0.229 | 0.050    | 0.051      |
| Residual            | 2491.79        | 28 | 88.99       |       |       |          |            |

Note. Type III Sum of Squares

As a control, a one-way ANOVA was performed to assess whether there was a difference in % freezing during reactivation between the four groups (EH-SAL, EH-MDZ, SH-SAL, SH-MDZ).

#### Descriptives - R\_5min

| Group  | Mean  | SD    | N |
|--------|-------|-------|---|
| EH-MDZ | 48.83 | 10.10 | 8 |
| EH-SAL | 49.25 | 12.15 | 8 |
| SH-MDZ | 45.46 | 12.88 | 8 |
| SH-SAL | 49.46 | 12.17 | 8 |

#### ANOVA - R\_5min

| Cases    | Sum of Squares | df | Mean Square | F     | p     | $\eta^2$ | $\eta^2_p$ |
|----------|----------------|----|-------------|-------|-------|----------|------------|
| Group    | 84.75          | 3  | 28.25       | 0.200 | 0.895 | 0.021    | 0.021      |
| Residual | 3946.81        | 28 | 140.96      |       |       |          |            |

Note. Type III Sum of Squares

### 3. The influence of impoverished housing (IH) on the amnestic effect of MDZ

A two-way ANOVA with factors Housing (IH vs. SH) and Treatment (SAL vs. MDZ) was performed to assess the influence of impoverished housing on the amnestic effect of MDZ on % freezing during test (first 5 min and complete 10-min session).

According to a predefined exclusion criterium, 8 rats (3 IH-SAL, 5 IH-MDZ) were excluded since they showed freezing levels of <25% during the reactivation session. Statistical analyses were performed without these 8 rats (3.1) and with all rats included (3.2).

#### 3.1 Analyses in which 8 rats were excluded

##### A. For the complete 10-min test session

#### Descriptives - T\_10min

| Housing | Treatment | Mean  | SD     | N |
|---------|-----------|-------|--------|---|
| IH      | MDZ       | 22.56 | 15.953 | 3 |
|         | SAL       | 18.37 | 2.777  | 5 |
| SH      | MDZ       | 30.83 | 7.828  | 8 |
|         | SAL       | 31.65 | 8.849  | 8 |

#### ANOVA - T\_10min

| Cases               | Sum of Squares | df | Mean Square | F     | p     | $\eta^2$ | $\eta^2_p$ |
|---------------------|----------------|----|-------------|-------|-------|----------|------------|
| Housing             | 593.24         | 1  | 593.24      | 7.821 | 0.011 | 0.275    | 0.281      |
| Treatment           | 14.55          | 1  | 14.55       | 0.192 | 0.666 | 0.007    | 0.010      |
| Housing * Treatment | 31.93          | 1  | 31.93       | 0.421 | 0.524 | 0.015    | 0.021      |
| Residual            | 1516.95        | 20 | 75.85       |       |       |          |            |

Note. Type III Sum of Squares

## B. For the first 5 min of the test session

### Descriptives - T\_5min

| Housing | Treatment | Mean  | SD     | N |
|---------|-----------|-------|--------|---|
| IH      | MDZ       | 19.78 | 18.446 | 3 |
|         | SAL       | 18.67 | 5.798  | 5 |
| SH      | MDZ       | 23.88 | 5.589  | 8 |
|         | SAL       | 29.46 | 9.020  | 8 |

### ANOVA - T\_5min

| Cases               | Sum of Squares | df | Mean Square | F     | p     | $\eta^2$ | $\eta^2_p$ |
|---------------------|----------------|----|-------------|-------|-------|----------|------------|
| Housing             | 282.99         | 1  | 282.99      | 3.530 | 0.075 | 0.144    | 0.150      |
| Treatment           | 25.53          | 1  | 25.53       | 0.319 | 0.579 | 0.013    | 0.016      |
| Housing * Treatment | 57.21          | 1  | 57.21       | 0.714 | 0.408 | 0.029    | 0.034      |
| Residual            | 1603.16        | 20 | 80.16       |       |       |          |            |

Note. Type III Sum of Squares

As a control, a one-way ANOVA was performed to assess whether there was a difference in % freezing during reactivation between the four groups (IH-SAL, IH-MDZ, SH-SAL, SH-MDZ).

### Descriptives - R\_5min

| Group  | Mean  | SD     | N |
|--------|-------|--------|---|
| IH-MDZ | 40.44 | 9.335  | 3 |
| IH-SAL | 34.20 | 6.265  | 5 |
| SH-MDZ | 45.46 | 12.884 | 8 |
| SH-SAL | 49.46 | 12.171 | 8 |

### ANOVA - R\_5min

| Cases    | Sum of Squares | df | Mean Square | F     | p     | $\eta^2$ | $\eta^2_p$ |
|----------|----------------|----|-------------|-------|-------|----------|------------|
| Group    | 772.7          | 3  | 257.6       | 2.036 | 0.141 | 0.234    | 0.234      |
| Residual | 2530.2         | 20 | 126.5       |       |       |          |            |

Note. Type III Sum of Squares

## 3.2 Analyses in which all rats were included

### A. For the complete 10-min test session

#### Descriptives - T\_10min

| Housing | Treatment | Mean  | SD     | N |
|---------|-----------|-------|--------|---|
| IH      | MDZ       | 16.50 | 10.729 | 8 |
|         | SAL       | 18.73 | 7.735  | 8 |
| SH      | MDZ       | 30.83 | 7.828  | 8 |
|         | SAL       | 31.65 | 8.849  | 8 |

#### ANOVA - T\_10min

| Cases               | Sum of Squares | df | Mean Square | F      | p      | $\eta^2$ | $\eta^2_p$ |
|---------------------|----------------|----|-------------|--------|--------|----------|------------|
| Housing             | 1485.125       | 1  | 1485.125    | 18.888 | < .001 | 0.400    | 0.403      |
| Treatment           | 18.503         | 1  | 18.503      | 0.235  | 0.631  | 0.005    | 0.008      |
| Housing * Treatment | 4.014          | 1  | 4.014       | 0.051  | 0.823  | 0.001    | 0.002      |

**ANOVA - T\_10min**

| Cases    | Sum of Squares | df | Mean Square | F | p | $\eta^2$ | $\eta^2_p$ |
|----------|----------------|----|-------------|---|---|----------|------------|
| Residual | 2201.632       | 28 | 78.630      |   |   |          |            |

Note. Type III Sum of Squares

**B. For the first 5 min of the test session**

**Descriptives - T\_5min**

| Housing | Treatment | Mean  | SD     | N |
|---------|-----------|-------|--------|---|
| IH      | MDZ       | 12.83 | 12.553 | 8 |
|         | SAL       | 16.75 | 8.923  | 8 |
| SH      | MDZ       | 23.88 | 5.589  | 8 |
|         | SAL       | 29.46 | 9.020  | 8 |

**ANOVA - T\_5min**

| Cases               | Sum of Squares | df | Mean Square | F      | p     | $\eta^2$ | $\eta^2_p$ |
|---------------------|----------------|----|-------------|--------|-------|----------|------------|
| Housing             | 1128.125       | 1  | 1128.125    | 12.900 | 0.001 | 0.300    | 0.315      |
| Treatment           | 180.500        | 1  | 180.500     | 2.064  | 0.162 | 0.048    | 0.069      |
| Housing * Treatment | 5.556          | 1  | 5.556       | 0.064  | 0.803 | 0.001    | 0.002      |
| Residual            | 2448.583       | 28 | 87.449      |        |       |          |            |

Note. Type III Sum of Squares

As a control, a one-way ANOVA was performed to assess whether there was a difference in % freezing during reactivation between the four groups (IH-SAL, IH-MDZ, SH-SAL, SH-MDZ).

**Descriptives - R\_5min**

| Group  | Mean  | SD    | N |
|--------|-------|-------|---|
| IH-MDZ | 22.29 | 16.53 | 8 |
| IH-SAL | 28.04 | 10.06 | 8 |
| SH-MDZ | 45.46 | 12.88 | 8 |
| SH-SAL | 49.46 | 12.17 | 8 |

**ANOVA - R\_5min**

| Cases    | Sum of Squares | df | Mean Square | F     | p     | $\eta^2$ | $\eta^2_p$ |
|----------|----------------|----|-------------|-------|-------|----------|------------|
| Group    | 4172           | 3  | 1390.5      | 8.078 | <.001 | 0.464    | 0.464      |
| Residual | 4820           | 28 | 172.1       |       |       |          |            |

Note. Type III Sum of Squares

Since there was a between-group difference in % freezing during reactivation, a mixed ANOVA with within-subjects factor Session (Reactivation vs. Test) and between-subjects factors Housing (IH vs. SH) and Treatment (SAL vs. MDZ) was conducted.

**A. For the complete 10-min test session**

**Descriptives**

| Session     | Housing | Treatment | Mean  | SD     | N |
|-------------|---------|-----------|-------|--------|---|
| React       | IH      | MDZ       | 22.29 | 16.531 | 8 |
|             |         | SAL       | 28.04 | 10.058 | 8 |
|             | SH      | MDZ       | 45.46 | 12.884 | 8 |
|             |         | SAL       | 49.46 | 12.171 | 8 |
| Test 10 min | IH      | MDZ       | 16.50 | 10.729 | 8 |
|             |         | SAL       | 18.73 | 7.735  | 8 |
|             | SH      | MDZ       | 30.83 | 7.828  | 8 |
|             |         | SAL       | 31.65 | 8.849  | 8 |

**Within Subjects Effects**

|                               | Sum of Squares | df | Mean Square | F      | p      | $\eta^2$ | $\eta^2_p$ |
|-------------------------------|----------------|----|-------------|--------|--------|----------|------------|
| Session                       | 2260.210       | 1  | 2260.210    | 29.242 | < .001 | 0.474    | 0.511      |
| Session * Housing             | 300.444        | 1  | 300.444     | 3.887  | 0.059  | 0.063    | 0.122      |
| Session * Treatment           | 45.002         | 1  | 45.002      | 0.582  | 0.452  | 0.009    | 0.020      |
| Session * Housing * Treatment | 0.111          | 1  | 0.111       | 0.001  | 0.970  | 0.000    | 0.000      |
| Residual                      | 2164.177       | 28 | 77.292      |        |        |          |            |

Note. Type III Sum of Squares

**Between Subjects Effects**

|                     | Sum of Squares | df | Mean Square | F      | p      | $\eta^2$ | $\eta^2_p$ |
|---------------------|----------------|----|-------------|--------|--------|----------|------------|
| Housing             | 5160.03        | 1  | 5160.03     | 29.744 | < .001 | 0.506    | 0.515      |
| Treatment           | 163.63         | 1  | 163.63      | 0.943  | 0.340  | 0.016    | 0.033      |
| Housing * Treatment | 10.03          | 1  | 10.03       | 0.058  | 0.812  | 0.001    | 0.002      |
| Residual            | 4857.40        | 28 | 173.48      |        |        |          |            |

Note. Type III Sum of Squares

**B. For the first 5 min of the test session****Descriptives**

| Session    | Housing | Treatment | Mean  | SD     | N |
|------------|---------|-----------|-------|--------|---|
| React      | IH      | MDZ       | 22.29 | 16.531 | 8 |
|            |         | SAL       | 28.04 | 10.058 | 8 |
|            | SH      | MDZ       | 45.46 | 12.884 | 8 |
|            |         | SAL       | 49.46 | 12.171 | 8 |
| Test 5 min | IH      | MDZ       | 12.83 | 12.553 | 8 |
|            |         | SAL       | 16.75 | 8.923  | 8 |
|            | SH      | MDZ       | 23.88 | 5.589  | 8 |
|            |         | SAL       | 29.46 | 9.020  | 8 |

**Within Subjects Effects**

|                               | Sum of Squares | df | Mean Square | F      | p      | $\eta^2$ | $\eta^2_p$ |
|-------------------------------|----------------|----|-------------|--------|--------|----------|------------|
| Session                       | 3885.444       | 1  | 3885.444    | 66.675 | < .001 | 0.652    | 0.704      |
| Session * Housing             | 434.028        | 1  | 434.028     | 7.448  | 0.011  | 0.073    | 0.210      |
| Session * Treatment           | 0.063          | 1  | 0.063       | 0.001  | 0.974  | 0.000    | 0.000      |
| Session * Housing * Treatment | 11.674         | 1  | 11.674      | 0.200  | 0.658  | 0.002    | 0.007      |
| Residual                      | 1631.681       | 28 | 58.274      |        |        |          |            |

Note. Type III Sum of Squares

**Between Subjects Effects**

|                     | Sum of Squares | df | Mean Square | F        | p      | $\eta^2$ | $\eta^2_p$ |
|---------------------|----------------|----|-------------|----------|--------|----------|------------|
| Housing             | 4669.444       | 1  | 4669.444    | 23.195   | < .001 | 0.437    | 0.453      |
| Treatment           | 370.562        | 1  | 370.562     | 1.841    | 0.186  | 0.035    | 0.062      |
| Housing * Treatment | 0.007          | 1  | 0.007       | 3.450e-5 | 0.995  | 0.000    | 0.000      |
| Residual            | 5636.847       | 28 | 201.316     |          |        |          |            |

Note. Type III Sum of Squares

#### 4. Group differences in the temporal pattern of % freezing during the test session

In addition to the analyses described above, and based upon pilot data from two animals showing a substantial increase in freezing during the first minutes of testing, we also assessed **temporal changes throughout the 10-min test session**, using mixed repeated-measures ANOVAs including within-subjects factor Time (freezing per minute), and between-subjects factors Treatment and Housing. A graphical presentation of these data can be found in [Appendix C](#).

##### 4.1 Analyses in which 8 rats were excluded

###### Within Subjects Effects

|                                | Sphericity Correction | Sum of Squares     | df                  | Mean Square         | F                   | p                   | $\eta^2$ | $\eta^2_p$ |
|--------------------------------|-----------------------|--------------------|---------------------|---------------------|---------------------|---------------------|----------|------------|
| Test min                       | Greenhouse-Geisser    | 20632 <sup>a</sup> | 5.890 <sup>a</sup>  | 3502.7 <sup>a</sup> | 10.242 <sup>a</sup> | < .001 <sup>a</sup> | 0.204    | 0.231      |
| Test min * Housing             | Greenhouse-Geisser    | 6364 <sup>a</sup>  | 11.780 <sup>a</sup> | 540.2 <sup>a</sup>  | 1.579 <sup>a</sup>  | 0.101 <sup>a</sup>  | 0.063    | 0.085      |
| Test min * Treatment           | Greenhouse-Geisser    | 1541 <sup>a</sup>  | 5.890 <sup>a</sup>  | 261.7 <sup>a</sup>  | 0.765 <sup>a</sup>  | 0.596 <sup>a</sup>  | 0.015    | 0.022      |
| Test min * Housing * Treatment | Greenhouse-Geisser    | 4243 <sup>a</sup>  | 11.780 <sup>a</sup> | 360.2 <sup>a</sup>  | 1.053 <sup>a</sup>  | 0.402 <sup>a</sup>  | 0.042    | 0.058      |
| Residual                       | Greenhouse-Geisser    | 68492              | 200.264             | 342.0               |                     |                     |          |            |

Note. Type III Sum of Squares

<sup>a</sup> Mauchly's test of sphericity indicates that the assumption of sphericity is violated ( $p < .05$ ).

###### Between Subjects Effects

|                     | Sum of Squares | df | Mean Square | F     | p     | $\eta^2$ | $\eta^2_p$ |
|---------------------|----------------|----|-------------|-------|-------|----------|------------|
| Housing             | 9931.4         | 2  | 4965.7      | 4.865 | 0.014 | 0.218    | 0.222      |
| Treatment           | 385.8          | 1  | 385.8       | 0.378 | 0.543 | 0.008    | 0.011      |
| Housing * Treatment | 429.7          | 2  | 214.9       | 0.210 | 0.811 | 0.009    | 0.012      |
| Residual            | 34705.9        | 34 | 1020.8      |       |       |          |            |

Note. Type III Sum of Squares

##### 4.2 Analyses in which all rats were included

###### Within Subjects Effects

|                                | Sphericity Correction | Sum of Squares | df                  | Mean Square         | F                   | p                   | $\eta^2$           | $\eta^2_p$         |
|--------------------------------|-----------------------|----------------|---------------------|---------------------|---------------------|---------------------|--------------------|--------------------|
| Test min                       | Greenhouse-Geisser    | 27674          | <sup>a</sup> 6.115  | <sup>a</sup> 4525.4 | <sup>a</sup> 15.188 | <sup>a</sup> < .001 | <sup>a</sup> 0.238 | <sup>a</sup> 0.266 |
| Test min * Housing             | Greenhouse-Geisser    | 7400           | <sup>a</sup> 12.231 | <sup>a</sup> 605.0  | <sup>a</sup> 2.031  | <sup>a</sup> 0.021  | <sup>a</sup> 0.064 | <sup>a</sup> 0.088 |
| Test min * Treatment           | Greenhouse-Geisser    | 1624           | <sup>a</sup> 6.115  | <sup>a</sup> 265.6  | <sup>a</sup> 0.891  | <sup>a</sup> 0.503  | <sup>a</sup> 0.014 | <sup>a</sup> 0.021 |
| Test min * Housing * Treatment | Greenhouse-Geisser    | 3293           | <sup>a</sup> 12.231 | <sup>a</sup> 269.2  | <sup>a</sup> 0.904  | <sup>a</sup> 0.545  | <sup>a</sup> 0.028 | <sup>a</sup> 0.041 |
| Residual                       | Greenhouse-Geisser    | 76528          | 256.843             | 298.0               |                     |                     |                    |                    |

Note. Type III Sum of Squares

<sup>a</sup> Mauchly's test of sphericity indicates that the assumption of sphericity is violated ( $p < .05$ ).

###### Between Subjects Effects

|                     | Sum of Squares | df | Mean Square | F         | p      | $\eta^2$ | $\eta^2_p$ |
|---------------------|----------------|----|-------------|-----------|--------|----------|------------|
| Housing             | 25209.074      | 2  | 12604.537   | 12.740    | < .001 | 0.374    | 0.378      |
| Treatment           | 0.145          | 1  | 0.145       | 1.462e -4 | 0.990  | 0.000    | 0.000      |
| Housing * Treatment | 570.185        | 2  | 285.093     | 0.288     | 0.751  | 0.008    | 0.014      |
| Residual            | 41552.674      | 42 | 989.349     |           |        |          |            |

Note. Type III Sum of Squares



## 5. The influence of housing conditions on % freezing during pre- and post-shock period and reactivation.

ANOVAs with factor Housing (EH vs. SH vs. IH) were performed to compare % freezing during training (pre- and post-shock period) and reactivation between the three housing conditions.

### 5.1 Analyses in which all rats were included

#### A. Effect of Housing on baseline freezing (Day 1)

##### Descriptives - pre\_3 min

| Housing | Mean   | SD    | N  |
|---------|--------|-------|----|
| EH      | 21.562 | 7.537 | 16 |
| IH      | 4.861  | 5.265 | 16 |
| SH      | 18.299 | 7.159 | 16 |

##### ANOVA - pre\_3 min

| Cases    | Sum of Squares | df | Mean Square | F     | p      | $\eta^2$ | $\eta^2_p$ |
|----------|----------------|----|-------------|-------|--------|----------|------------|
| Housing  | 2507           | 2  | 1253.75     | 27.70 | < .001 | 0.552    | 0.552      |
| Residual | 2037           | 45 | 45.26       |       |        |          |            |

Note. Type III Sum of Squares

##### Post Hoc Comparisons - Housing

|       | Mean Difference | SE    | t      | Cohen's d | p <sub>tukey</sub> |
|-------|-----------------|-------|--------|-----------|--------------------|
| EH IH | 16.701          | 2.378 | 7.022  | 1.014     | < .001             |
| SH    | 3.264           | 2.378 | 1.372  | 0.198     | 0.364              |
| IH SH | -13.438         | 2.378 | -5.650 | -0.815    | < .001             |

Note. Cohen's d does not correct for multiple comparisons.

**pre\_3min**

Student-Newman-Keuls<sup>a,b</sup>

| Housing | N  | Subset      |             |
|---------|----|-------------|-------------|
|         |    | 1           | 2           |
| IH      | 16 | 4,861111111 |             |
| SH      | 16 |             | 18,29861111 |
| EH      | 16 |             | 21,5625000  |
| Sig.    |    | 1.000       | .177        |

Means for groups in homogeneous subsets are displayed.  
Based on observed means.  
The error term is Mean Square(Error) = 45.256.  
a. Uses Harmonic Mean Sample Size = 16.000.  
b. Alpha = 0.05.

Student Newman-Keuls post-hoc tests (SPSS Statistics) suggest that IH rats freeze significantly less during baseline freezing, compared to SH and EH rats.

#### B. Effect of Housing on post-shock freezing (Day 1)

##### Descriptives - post3

| Housing | Mean  | SD    | N  |
|---------|-------|-------|----|
| EH      | 57.50 | 18.31 | 16 |
| IH      | 35.50 | 19.41 | 16 |
| SH      | 65.13 | 19.45 | 16 |

##### ANOVA - post3

| Cases    | Sum of Squares | df | Mean Square | F     | p      | $\eta^2$ | $\eta^2_p$ |
|----------|----------------|----|-------------|-------|--------|----------|------------|
| Housing  | 7572           | 2  | 3786.1      | 10.42 | < .001 | 0.317    | 0.317      |
| Residual | 16352          | 45 | 363.4       |       |        |          |            |

Note. Type III Sum of Squares

##### Post Hoc Comparisons - Housing

|       | Mean Difference | SE    | t      | Cohen's d | p <sub>tukey</sub> |
|-------|-----------------|-------|--------|-----------|--------------------|
| EH IH | 22.000          | 6.740 | 3.264  | 0.471     | 0.006              |
| SH    | -7.625          | 6.740 | -1.131 | -0.163    | 0.500              |
| IH SH | -29.625         | 6.740 | -4.396 | -0.634    | < .001             |

Note. Cohen's d does not correct for multiple comparisons.

**post3**

Student-Newman-Keuls<sup>a,b</sup>

| Housing | N  | Subset |       |
|---------|----|--------|-------|
|         |    | 1      | 2     |
| IH      | 16 | 35,50  |       |
| EH      | 16 |        | 57,50 |
| SH      | 16 |        | 65,13 |
| Sig.    |    | 1.000  | .264  |

Means for groups in homogeneous subsets are displayed.  
Based on observed means.  
The error term is Mean Square(Error) = 363.372.  
a. Uses Harmonic Mean Sample Size = 16.000.  
b. Alpha = 0.05.

Student Newman-Keuls post-hoc tests suggest that IH rats freeze significantly less after the third shock, compared to SH and EH rats.

### C. Effect of Housing on freezing during reactivation (Day 2)

#### Descriptives - R\_5min

| Housing | Mean  | SD    | N  |
|---------|-------|-------|----|
| EH      | 49.04 | 10.80 | 16 |
| IH      | 25.17 | 13.55 | 16 |
| SH      | 47.46 | 12.28 | 16 |

#### ANOVA - R\_5min

| Cases    | Sum of Squares | df | Mean Square | F     | p     | $\eta^2$ | $\eta^2_p$ |
|----------|----------------|----|-------------|-------|-------|----------|------------|
| Housing  | 5704           | 2  | 2851.8      | 18.97 | <.001 | 0.457    | 0.457      |
| Residual | 6765           | 45 | 150.3       |       |       |          |            |

Note. Type III Sum of Squares

#### Post Hoc Comparisons - Housing

|       | Mean Difference | SE    | t      | Cohen's d | p <sub>tukey</sub> |
|-------|-----------------|-------|--------|-----------|--------------------|
| EH IH | 23.875          | 4.335 | 5.508  | 0.795     | <.001              |
| SH    | 1.583           | 4.335 | 0.365  | 0.053     | 0.929              |
| IH SH | -22.292         | 4.335 | -5.142 | -0.742    | <.001              |

Note. Cohen's d does not correct for multiple comparisons.

#### R\_5min

Student-Newman-Keuls<sup>a,b</sup>

| Housing | N  | Subset     |            |
|---------|----|------------|------------|
|         |    | 1          | 2          |
| IH      | 16 | 25,1666667 |            |
| SH      | 16 |            | 47,4583333 |
| EH      | 16 |            | 49,0416667 |
| Sig.    |    | 1.000      | .717       |

Means for groups in homogeneous subsets are displayed.

Based on observed means.

The error term is Mean Square(Error) = 150.330.

a. Uses Harmonic Mean Sample Size = 16.000.

b. Alpha = 0.05.

Student Newman-Keuls post-hoc tests suggest that IH rats freeze significantly less during reactivation, compared to SH and EH rats.

#### 5.2 Analyses in which 8 rats were excluded

The preregistration of the current study (<https://osf.io/8ezmq/register/565fb3678c5e4a66b5582f67>) contained the following exclusion criterion: 'Rats that freeze less than 25% during the reactivation session will be excluded from the analysis. Explorative analyses including all subjects will also be performed.' The aim of this predefined criterion was to exclude rats that did not sufficiently acquire the context-shock association because this could have hampered the investigation of memory interference.

On the other hand, in order to study the effect of housing conditions on % freezing during training and reactivation (preregistered under 'exploratory analyses'), it is not necessarily relevant to exclude rats that show low freezing during reactivation. Nevertheless, since the exclusion criterion was included in the preregistration and applied for analyzing other freezing data, we present the results of these analyses based on this subset of the data as well. The impairing influence of IH on baseline freezing is significant in this subset of rats as well.

### A. Effect of Housing on baseline freezing (Day 1)

#### Descriptives - pre\_3 min

| Housing | Mean   | SD    | N  |
|---------|--------|-------|----|
| EH      | 21.562 | 7.537 | 16 |
| IH      | 3.472  | 3.892 | 8  |
| SH      | 18.299 | 7.159 | 16 |

#### ANOVA - pre\_3 min

| Cases    | Sum of Squares | df | Mean Square | F     | p     | $\eta^2$ | $\eta^2_p$ |
|----------|----------------|----|-------------|-------|-------|----------|------------|
| Housing  | 1819           | 2  | 909.42      | 19.49 | <.001 | 0.513    | 0.513      |
| Residual | 1727           | 37 | 46.67       |       |       |          |            |

Note. Type III Sum of Squares

#### Post Hoc Comparisons - Housing

|       | Mean Difference | SE    | t      | Cohen's d | p <sub>tukey</sub> |
|-------|-----------------|-------|--------|-----------|--------------------|
| EH IH | 18.090          | 2.958 | 6.115  | 0.967     | <.001              |
| SH    | 3.264           | 2.415 | 1.351  | 0.214     | 0.375              |
| IH SH | -14.826         | 2.958 | -5.012 | -0.792    | <.001              |

Note. Cohen's d does not correct for multiple comparisons.

#### pre\_3min

Student-Newman-Keuls<sup>a,b,c</sup>

| Housing | N  | Subset    |            |
|---------|----|-----------|------------|
|         |    | 1         | 2          |
| IH      | 8  | 3,4722222 |            |
| SH      | 16 |           | 18,2986111 |
| EH      | 16 |           | 21,5625000 |
| Sig.    |    | 1.000     | .249       |

Means for groups in homogeneous subsets are displayed.

Based on observed means.

The error term is Mean Square(Error) = 46.671.

a. Uses Harmonic Mean Sample Size = 12.000.

b. The group sizes are unequal. The harmonic mean of the group sizes is used. Type I error levels are not guaranteed.

c. Alpha = 0.05.

Student Newman-Keuls post-hoc tests suggest that IH rats freeze significantly less during baseline, compared to SH and EH rats.

## B. Effect of Housing on post-shock freezing (Day 1)

### Descriptives - post3

| Housing | Mean  | SD    | N  |
|---------|-------|-------|----|
| EH      | 57.50 | 18.31 | 16 |
| IH      | 45.50 | 18.32 | 8  |
| SH      | 65.13 | 19.45 | 16 |

### ANOVA - post3

| Cases    | Sum of Squares | df | Mean Square | F     | p     | $\eta^2$ | $\eta^2_p$ |
|----------|----------------|----|-------------|-------|-------|----------|------------|
| Housing  | 2065           | 2  | 1032.7      | 2.928 | 0.066 | 0.137    | 0.137      |
| Residual | 13050          | 37 | 352.7       |       |       |          |            |

Note. Type III Sum of Squares

## C. Effect of Housing on freezing during reactivation (Day 2)

### Descriptives - R\_5min

| Housing | Mean  | SD     | N  |
|---------|-------|--------|----|
| EH      | 49.04 | 10.797 | 16 |
| IH      | 36.54 | 7.601  | 8  |
| SH      | 47.46 | 12.282 | 16 |

### ANOVA - R\_5min

| Cases    | Sum of Squares | df | Mean Square | F     | p     | $\eta^2$ | $\eta^2_p$ |
|----------|----------------|----|-------------|-------|-------|----------|------------|
| Housing  | 897.4          | 2  | 448.7       | 3.760 | 0.033 | 0.169    | 0.169      |
| Residual | 4415.9         | 37 | 119.3       |       |       |          |            |

Note. Type III Sum of Squares

### Post Hoc Comparisons - Housing

|       | Mean Difference | SE    | t      | Cohen's d | p <sub>tukey</sub> |
|-------|-----------------|-------|--------|-----------|--------------------|
| EH IH | 12.500          | 4.731 | 2.642  | 0.418     | 0.031              |
| SH    | 1.583           | 3.862 | 0.410  | 0.065     | 0.911              |
| IH SH | -10.917         | 4.731 | -2.308 | -0.365    | 0.067              |

Note. Cohen's d does not correct for multiple comparisons.

| R_5min                                |    |            |            |
|---------------------------------------|----|------------|------------|
| Student-Newman-Keuls <sup>a,b,c</sup> |    |            |            |
| Housing                               | N  | Subset     |            |
|                                       |    | 1          | 2          |
| IH                                    | 8  | 36,5416667 |            |
| SH                                    | 16 |            | 47,4583333 |
| EH                                    | 16 |            | 49,0416667 |
| Sig.                                  |    | 1.000      | .725       |

Means for groups in homogeneous subsets are displayed.

Based on observed means.

The error term is Mean Square(Error) = 119.349.

a. Uses Harmonic Mean Sample Size = 12.000.

b. The group sizes are unequal. The harmonic mean of the group sizes is used. Type I error levels are not guaranteed.

c. Alpha = 0.05.

Student Newman-Keuls post-hoc tests suggest that IH rats freeze significantly less during reactivation, compared to SH and EH rats.

## **6. The influence of housing conditions on body weight**

An ANOVA with factor Housing (EH vs. SH vs. IH) was performed to assess whether housing conditions influenced body weight as measured before the start of the fear-conditioning protocol (PND66).

### Descriptives - Weight PND66

| Housing | Mean  | SD    | N  |
|---------|-------|-------|----|
| EH      | 286.4 | 19.12 | 16 |
| IH      | 215.8 | 18.57 | 16 |
| SH      | 270.8 | 12.16 | 16 |

### ANOVA - Weight PND66

| Cases    | Sum of Squares | df | Mean Square | F     | p     | $\eta^2$ | $\eta^2_p$ |
|----------|----------------|----|-------------|-------|-------|----------|------------|
| Housing  | 44011          | 2  | 22005.6     | 76.90 | <.001 | 0.774    | 0.774      |
| Residual | 12877          | 45 | 286.2       |       |       |          |            |

Note. Type III Sum of Squares

| PND66                               |       |    |        |        |        |
|-------------------------------------|-------|----|--------|--------|--------|
| Student-Newman-Keuls <sup>a,b</sup> | Group | N  | Subset |        |        |
|                                     |       |    | 1      | 2      | 3      |
| .b                                  | IH    | 16 | 215.81 |        |        |
|                                     | SH    | 16 |        | 270.75 |        |
|                                     | EH    | 16 |        |        | 286.44 |
|                                     | Sig.  |    | 1.000  | 1.000  | 1.000  |

### Post Hoc Comparisons - Housing

|       | Mean Difference | SE    | t      | Cohen's d | p <sub>tukey</sub> |
|-------|-----------------|-------|--------|-----------|--------------------|
| EH IH | 70.62           | 5.981 | 11.809 | 1.704     | <.001              |
| SH    | 15.69           | 5.981 | 2.623  | 0.379     | 0.031              |
| IH SH | -54.94          | 5.981 | -9.186 | -1.326    | <.001              |

Note. Cohen's d does not correct for multiple comparisons.

Student Newman-Keuls post-hoc tests suggest that all housing conditions differ significantly in body weight at PND 66.

A mixed ANOVA with within-subjects factor Age and between-subject factor Housing (EH vs. SH vs. IH) was performed to assess whether housing conditions influenced the increase in body weight throughout development.

**Within Subjects Effects**

|               | Sphericity Correction | Sum of Squares         | df                 | Mean Square            | F                    | p                   | $\eta^2$ | $\eta^2_p$ |
|---------------|-----------------------|------------------------|--------------------|------------------------|----------------------|---------------------|----------|------------|
| Age           | Greenhouse-Geisser    | 3.100e +6 <sup>a</sup> | 1.934 <sup>a</sup> | 1.602e +6 <sup>a</sup> | 4664.16 <sup>a</sup> | < .001 <sup>a</sup> | 0.962    | 0.990      |
| Age * Housing | Greenhouse-Geisser    | 90982 <sup>a</sup>     | 3.869 <sup>a</sup> | 23516.70 <sup>a</sup>  | 68.46 <sup>a</sup>   | < .001 <sup>a</sup> | 0.028    | 0.753      |
| Residual      | Greenhouse-Geisser    | 29904                  | 87.049             | 343.53                 |                      |                     |          |            |

Note. Type III Sum of Squares

<sup>a</sup> Mauchly's test of sphericity indicates that the assumption of sphericity is violated (p < .05).

**Between Subjects Effects**

|          | Sum of Squares | df | Mean Square | F     | p      | $\eta^2$ | $\eta^2_p$ |
|----------|----------------|----|-------------|-------|--------|----------|------------|
| Housing  | 150280         | 2  | 75140       | 56.80 | < .001 | 0.716    | 0.716      |
| Residual | 59533          | 45 | 1323        |       |        |          |            |

Note. Type III Sum of Squares
