# Supplementary material
Source: PubMed Central journal article supplement (PMC6320387)
Supplement: mmc3.pdf [file mmc3.pdf]

# Post-Weaning Housing Conditions Influence Freezing during Contextual Fear Conditioning in Adult Rats

Natalie Schroyens, Cristian Luis Bender, Joaquín Matias Alfei, Víctor Alejandro Molina, Laura Luyten, Tom Beckers

## -- Appendix C: Temporal pattern of % freezing per group --

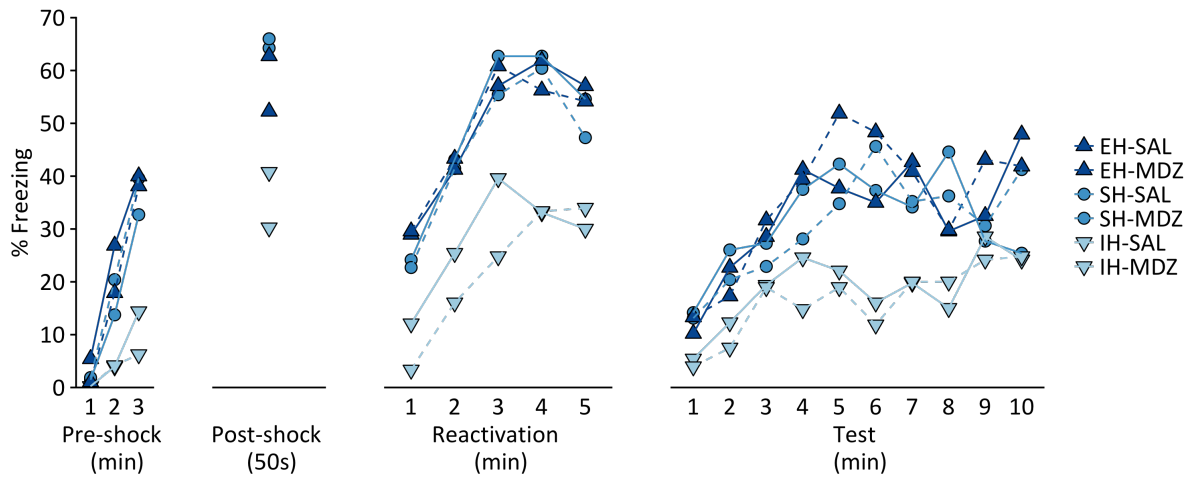

**Figure C.1.** Temporal pattern of % freezing per group. EH = enriched housing, SH = standard housing, IH = impoverished housing. Means of saline (SAL) groups are represented by solid lines and those of midazolam (MDZ) groups by dashed lines. All rats are included ( $N = 48$ ).
